# Supplementary material for: Highly Recurrent Copy Number Variations in GABRB2 Associated With Schizophrenia and Premenstrual Dysphoric Disorder
Source: Front Psychiatry. 2020 Jun 30;11:572. doi: 10.3389/fpsyt.2020.00572 (PMC7338560; doi:10.3389/fpsyt.2020.00572)
Supplement: Supplementary file 4 [file Table_4.xls]

## Sheet: a
Supplementary Table S4a. Comparison of CNV frequencies between non-SCZ control cohorts of different ethnicity.
CNV ID	Gender	G vs. (L+N)							L vs. (G+N)
		Chinese non-SCZ		German non-SCZ		p-Value	OR (95% CI)		Chinese non-SCZ		German non-SCZ		p-Value	OR (95% CI)
		G	L+N	G	L+N				L	G+N	L	G+N
esv2730987	M+F	37	249	9	201	0.00177619	3.32 (1.56-7.04)		7	279	8	202	0.541978	0.63 (0.23-1.78)
esv2730987	M	26	135	5	105	0.00590853	4.04 (1.5-10.89)		6	155	4	106	1	1.03 (0.28-3.72)
esv2730987	F	11	114	4	96	0.243878	2.32 (0.71-7.51)		1	124	4	96	0.244832	0.19 (0.02-1.76)
nsv1177513	M+F	76	201	41	169	0.0552179	1.56 (1.01-2.4)		31	255	20	190	0.743705	1.15 (0.64-2.09)
nsv1177513	M	42	105	26	84	0.456562	1.29 (0.73-2.28)		18	143	7	103	0.25773	1.85 (0.75-4.6)
nsv1177513	F	34	96	15	85	0.0593567	2.01 (1.02-3.94)		13	112	13	87	0.691845	0.78 (0.34-1.76)
Note: odds ratios were all calculated as the statistic in Chinese non-SCZ divided by the statistic in German non-SCZ. Significant p-Values < 0.05 are highlighed in red.

## Sheet: b
Supplementary Table S4b. Comparison of CNV frequencies in SCZ cases between different populations.
CNV ID	Gender	G vs. (L+N)							L vs. (G+N)
		Chinese SCZ		German SCZ		p-Value	OR (95% CI)		Chinese SCZ		German SCZ		p-Value	OR (95% CI)
		G	L+N	G	L+N				L	G+N	L	G+N
esv2730987	M+F	69	216	23	184	2.63024e-44	2.56 (1.53-4.26)		1	284	7	200	0.0236334	0.1 (0.01-0.82)
esv2730987	M	43	117	8	93	7.90104e-24	4.27 (1.92-9.53)		0	160	6	95	0.00703736	0 (0-NaN)
esv2730987	F	26	99	15	91	4.82881e-21	1.59 (0.79-3.2)		1	124	1	105	1	0.85 (0.05-13.7)
nsv1177513	M+F	155	130	77	130	8.15317e-06	2.01 (1.4-2.9)		10	275	21	186	0.00506618	0.32 (0.15-0.7)
nsv1177513	M	85	75	42	59	0.000975834	1.59 (0.96-2.63)		4	156	3	98	1	0.84 (0.18-3.82)
nsv1177513	F	70	55	35	71	0.00206099	2.58 (1.51-4.42)		6	119	18	88	0.00499836	0.25 (0.09-0.65)
Note: odds ratios were all calculated as the statistic in Chinese SCZ divided by the statistic in German SCZ. Significant p-Values < 0.05 are highlighed in red.

## Sheet: c
Supplementary Table S4c. Comparison of CNV frequencies in SCZ cases between different genders.
CNV ID	Population	G vs. (L+N)							L vs. (G+N)
		Male SCZ		Female SCZ		p-Value	OR (95% CI)		Male SCZ		Female SCZ		p-Value	OR (95% CI)
		G	L+N	G	L+N				L	G+N	L	G+N
esv2730987	Chinese	43	117	26	99	0.294314	1.40 (0.80-2.44)		0	160	1	124	0.901346	0 (0-NaN)
esv2730987	German	8	93	15	91	0.228412	0.52 (0.21-1.29)		6	95	1	105	0.108809	6.63 (0.78-56.09)
nsv1177513	Chinese	85	75	70	55	0.716074	0.89 (0.56-1.43)		4	156	3	98	1	0.84 (0.18-3.82)
nsv1177513	German	42	59	35	71	0.25822	1.44 (0.82-2.54)		6	119	18	88	0.00499836	0.25 (0.09-0.65)
Note: odds ratios were all calculated as the statistic in Male SCZ divided by the statistic in Female SCZ. Significant p-Values < 0.05 are highlighed in red.

## Sheet: d
Supplenmentary Table S4d. Comparison of CNV frequencies between SCZ patients and controls.
Ethnic Group	Gender	CNV ID	Control (CNVs)				SCZ (CNVs)				G vs. (N+L)			L vs. (N+G)			N vs. (L+G)
			L (%)	N (%)	G (%)		L (%)	N (%)	G (%)		p-Value	OR (95% CI)		p-Value	OR (95% CI)		p-Value	OR (95% CI)
Chinese	M + F	esv2730987	7 (2.45)	242 (84.62)	37 (12.94)		1 (0.35)	215 (75.44)	69 (24.21)		0.000532	2.15 (1.39-3.33)		0.0758489	0.14 (0.02-1.15)		0.00833549	0.56 (0.37-0.85)
Chinese	M	esv2730987	6 (3.73)	129 (80.12)	26 (16.15)		0 (0)	117 (73.13)	43 (26.88)		0.0193	1.91 (1.11-3.3)		0.0400826	0 (0-NaN)		0.177063	0.67 (0.4-1.14)
Chinese	F	esv2730987	1 (0.8)	113 (90.4)	11 (8.8)		1 (0.8)	98 (78.4)	26 (20.8)		0.00755	2.72 (1.28-5.79)		1	1 (0.06-16.17)		0.0146793	0.39 (0.19-0.8)
German	M + F	esv2730987	8 (3.81)	193 (91.9)	9 (4.29)		7 (3.38)	177 (85.51)	23 (11.11)		0.00884	2.79 (1.26-6.19)		1	0.88 (0.31-2.48)		0.0560509	0.52 (0.28-0.97)
German	M	esv2730987	4 (3.64)	101 (91.82)	5 (4.55)		6 (5.94)	87 (86.14)	8 (7.92)		0.308	1.81 (0.57-5.71)		0.643638	1.67 (0.46-6.11)		0.270757	0.55 (0.23-1.34)
German	F	esv2730987	4 (4)	92 (92)	4 (4)		1 (0.94)	90 (84.91)	15 (14.15)		0.0119	3.96 (1.27-12.36)		0.331136	0.23 (0.03-2.08)		0.171018	0.49 (0.2-1.2)
Chinese	M + F	nsv1177513	31 (10.84)	179 (62.59)	76 (26.57)		10 (3.51)	120 (42.11)	155 (54.39)		1.28e-11	3.29 (2.32-4.68)		0.00123615	0.3 (0.14-0.62)		1.46453e-06	0.43 (0.31-0.61)
Chinese	M	nsv1177513	18 (11.18)	101 (62.73)	42 (26.09)		4 (2.5)	71 (44.38)	85 (53.13)		7.3e-07	3.21 (2.01-5.13)		0.00428152	0.2 (0.07-0.62)		0.00144437	0.47 (0.3-0.74)
Chinese	F	nsv1177513	13 (10.4)	78 (62.4)	34 (27.2)		6 (4.8)	49 (39.2)	70 (56)		3.85e-06	3.41 (2.01-5.78)		0.152148	0.43 (0.16-1.18)		0.000396798	0.39 (0.23-0.65)
German	M + F	nsv1177513	20 (9.52)	149 (70.95)	41 (19.52)		21 (10.14)	109 (52.66)	77 (37.2)		6.17e-05	2.44 (1.57-3.8)		0.961307	1.07 (0.56-2.04)		0.000180354	0.46 (0.3-0.68)
German	M	nsv1177513	7 (6.36)	77 (70)	26 (23.64)		3 (2.97)	56 (55.45)	42 (41.58)		0.00533	2.3 (1.27-4.16)		0.403967	0.45 (0.11-1.79)		0.0408428	0.53 (0.3-0.94)
German	F	nsv1177513	13 (13)	72 (72)	15 (15)		18 (16.98)	53 (50)	35 (33.02)		0.00257	2.79 (1.41-5.53)		0.545997	1.37 (0.63-2.96)		0.00201432	0.39 (0.22-0.69)
Note: odds ratios were all calculated as the statistic in SCZ divided by the statistic in controls. Significant p-Values < 0.05 are highlighed in red.

## Sheet: e
Supplementary Table S4e. Comparison of CNV frequencies between PMDD patients and controls.
Ethnic Group	Gender	CNV ID	Control (CNVs)				PMDD (CNVs)				G vs. (N+L)			L vs. (N+G)			N vs. (L+G)
			L (%)	N (%)	G (%)		L (%)	N (%)	G (%)		p-Value	OR (95% CI)		p-Value	OR (95% CI)		p-Value	OR (95% CI)
Chinese	Female	esv2730987	5 (2.4)	170 (81.73)	33 (15.87)		4 (1.86)	68 (31.63)	143 (66.51)		4.34e-26	10.53 (6.6-16.81)		0.959972	0.77 (0.2-2.91)		2.49396e-33	0.06 (0.04-0.1)
Chinese	Female	nsv1177513	5 (2.4)	152 (73.08)	51 (24.52)		4 (1.86)	117 (54.42)	94 (43.72)		3.19e-05	2.39 (1.58-3.62)		0.959972	0.77 (0.2-2.91)		6.08397e-12	0.21 (0.13-0.33)
Note: odds ratios were all calculated as the statistic in SCZ divided by the statistic in controls. Significant p-Values < 0.05 are highlighed in red.

## Sheet: f
Supplementary Table S4f. Comparison of haplotype frequencies between patients and controls of different ethnicity and diseases.
Disease	Population	Gender	Haplotype (esv2730987-nsv1177513)	No. of Cases			No. of Controls		p-Value	OR (95% CI)
				with Haplotype (%)	without Haplotype		with Haplotype (%)	without Haplotype
Chinese SCZ cohort
SCZ	Chinese	M + F	G-G	57 (20)	228		24 (8.39)	262	0.000116	2.73 (1.64-4.54)
SCZ	Chinese	M	G-G	40 (25)	120		18 (11.18)	143	0.00212	2.65 (1.44-4.86)
SCZ	Chinese	F	G-G	17 (13.6)	108		6 (4.8)	119	0.0287	3.12 (1.19-8.21)
SCZ	Chinese	M + F	G-N	12 (4.21)	273		13 (4.55)	273	1	0.92 (0.41-2.06)
SCZ	Chinese	M	G-N	3 (1.88)	157		8 (4.97)	153	0.224	0.37 (0.1-1.4)
SCZ	Chinese	F	G-N	9 (7.2)	116		5 (4)	120	0.409	1.86 (0.61-5.72)
SCZ	Chinese	M + F	L-L	1 (0.35)	284		3 (1.05)	283	0.618	0.33 (0.03-3.21)
SCZ	Chinese	M	L-L	0 (0)	160		3 (1.86)	158	0.248	0 (0-NaN)
SCZ	Chinese	F	L-L	1 (0.8)	124		0 (0)	125	1	Inf (NaN-Inf)
SCZ	Chinese	M + F	L-N	0 (0)	285		4 (1.4)	282	0.133	0 (0-NaN)
SCZ	Chinese	M	L-N	0 (0)	160		3 (1.86)	158	0.248	0 (0-NaN)
SCZ	Chinese	F	L-N	0 (0)	125		1 (0.8)	124	1	0 (0-NaN)
SCZ	Chinese	M + F	N-G	98 (34.39)	187		52 (18.18)	234	1.68e-05	2.36 (1.6-3.47)
SCZ	Chinese	M	N-G	45 (28.13)	115		24 (14.91)	137	0.00602	2.23 (1.28-3.89)
SCZ	Chinese	F	N-G	53 (42.4)	72		28 (22.4)	97	0.00118	2.55 (1.47-4.42)
SCZ	Chinese	M + F	N-L	9 (3.16)	276		28 (9.79)	258	0.0023	0.3 (0.14-0.65)
SCZ	Chinese	M	N-L	4 (2.5)	156		15 (9.32)	146	0.0187	0.25 (0.08-0.77)
SCZ	Chinese	F	N-L	5 (4)	120		13 (10.4)	112	0.0868	0.36 (0.12-1.04)
SCZ	Chinese	M + F	N-N	108 (37.89)	177		162 (56.64)	124	1.07e-05	0.47 (0.33-0.65)
SCZ	Chinese	M	N-N	68 (42.5)	92		90 (55.9)	71	0.022	0.58 (0.37-0.91)
SCZ	Chinese	F	N-N	40 (32)	85		72 (57.6)	53	8.06e-05	0.35 (0.21-0.58)
German SCZ cohort
SCZ	German	M + F	G-G	18 (8.7)	189		5 (2.39)	204	0.00937	3.89 (1.41-10.67)
SCZ	German	M	G-G	5 (4.95)	96		3 (2.73)	107	0.628	1.86 (0.43-7.98)
SCZ	German	F	G-G	13 (12.26)	93		2 (2.02)	97	0.0109	6.78 (1.49-30.86)
SCZ	German	M + F	G-L	1 (0.48)	206		0 (0)	209	0.996	Inf (NaN-Inf)
SCZ	German	M	G-L	1 (0.99)	100		0 (0)	110	0.966	Inf (NaN-Inf)
SCZ	German	M + F	G-N	4 (1.93)	203		4 (1.91)	205	1	1.01 (0.25-4.09)
SCZ	German	M	G-N	2 (1.98)	99		2 (1.82)	108	1	1.09 (0.15-7.89)
SCZ	German	F	G-N	2 (1.89)	104		2 (2.02)	97	1	0.93 (0.13-6.75)
SCZ	German	M + F	L-G	1 (0.48)	206		0 (0)	209	0.996	Inf (NaN-Inf)
SCZ	German	M	L-G	1 (0.99)	100		0 (0)	110	0.966	Inf (NaN-Inf)
SCZ	German	M + F	L-L	2 (0.97)	205		4 (1.91)	205	0.69	0.5 (0.09-2.76)
SCZ	German	M	L-L	1 (0.99)	100		1 (0.91)	109	1	1.09 (0.07-17.66)
SCZ	German	F	L-L	1 (0.94)	105		3 (3.03)	96	0.566	0.3 (0.03-2.98)
SCZ	German	M + F	L-N	4 (1.93)	203		4 (1.91)	205	1	1.01 (0.25-4.09)
SCZ	German	M	L-N	4 (3.96)	97		3 (2.73)	107	0.909	1.47 (0.32-6.74)
SCZ	German	F	L-N	0 (0)	106		1 (1.01)	98	0.973	0 (0-NaN)
SCZ	German	M + F	N-G	58 (28.02)	149		36 (17.22)	173	0.0119	1.87 (1.17-2.99)
SCZ	German	M	N-G	36 (35.64)	65		23 (20.91)	87	0.0258	2.09 (1.13-3.87)
SCZ	German	F	N-G	22 (20.75)	84		13 (13.13)	86	0.206	1.73 (0.82-3.66)
SCZ	German	M + F	N-L	18 (8.7)	189		16 (7.66)	193	0.835	1.15 (0.57-2.32)
SCZ	German	M	N-L	1 (0.99)	100		6 (5.45)	104	0.154	0.17 (0.02-1.47)
SCZ	German	F	N-L	17 (16.04)	89		10 (10.1)	89	0.294	1.7 (0.74-3.92)
SCZ	German	M + F	N-N	101 (48.79)	106		140 (66.99)	69	0.000253	0.47 (0.32-0.7)
SCZ	German	M	N-N	50 (49.5)	51		72 (65.45)	38	0.0275	0.52 (0.3-0.9)
SCZ	German	F	N-N	51 (48.11)	55		68 (68.69)	31	0.00449	0.42 (0.24-0.75)
PMDD cohort
PMDD	Chinese	F	G-G	60 (27.91)	155		13 (6.25)	195	8.21e-09	5.81 (3.08-10.96)
PMDD	Chinese	F	G-L	3 (1.4)	212		0 (0)	208	0.258	Inf (NaN-Inf)
PMDD	Chinese	F	G-N	80 (37.21)	135		20 (9.62)	188	5.26e-11	5.57 (3.25-9.54)
PMDD	Chinese	F	L-G	3 (1.4)	212		0 (0)	208	0.258	Inf (NaN-Inf)
PMDD	Chinese	F	L-L	0 (0)	215		2 (0.96)	206	0.464	0 (0-NaN)
PMDD	Chinese	F	L-N	1 (0.47)	214		3 (1.44)	205	0.592	0.32 (0.03-3.09)
PMDD	Chinese	F	N-G	31 (14.42)	184		38 (18.27)	170	0.347	0.75 (0.45-1.27)
PMDD	Chinese	F	N-L	1 (0.47)	214		3 (1.44)	205	0.592	0.32 (0.03-3.09)
PMDD	Chinese	F	N-N	36 (16.74)	179		129 (62.02)	79	3.58e-21	0.12 (0.08-0.19)
Note: Significant p-Values < 0.05 are highlighted in red. OR was calculated using statistic in patients divided by statistic in controls.
